# Supplementary material for: Growth Kinetics and Protective Efficacy of Attenuated ASFV Strain Congo with Deletion of the EP402 Gene
Source: Viruses. 2021 Jun 28;13(7):1259. doi: 10.3390/v13071259 (PMC8309992; doi:10.3390/v13071259)
Supplement: Supplementary file 1 [file viruses-13-01259-s001.zip › viruses-1217481-supplementary.pdf]

Supplementary materials

**Table S1.** Clinical Scoring of swine inoculated with ASFV.

| Characteristic            |      | Score (points)                                                                                           |
|---------------------------|------|----------------------------------------------------------------------------------------------------------|
| <b>Anorexia</b>           | 1-4  | Reduced eating                                                                                           |
|                           | 5-8  | Only picking at food                                                                                     |
|                           | 9-10 | Not eating                                                                                               |
|                           |      |                                                                                                          |
| <b>Recumbency</b>         | 1-3  | Lethargic                                                                                                |
|                           | 4-5  | Animal gets up only when touched                                                                         |
|                           | 6-8  | Gets up only slowly when touched                                                                         |
|                           | 9-10 | Remains recumbent when touched                                                                           |
|                           |      |                                                                                                          |
| <b>Neurologic signs</b>   | 0    | Normal                                                                                                   |
|                           | 1-10 | Neurological disorders (ataxia, paralysis, convulsion) depending on the occurrence and severity of signs |
|                           |      |                                                                                                          |
| <b>Skin lesion</b>        | 0    | Normal                                                                                                   |
|                           | 1-10 | Skin erythema, edema, and hemorrhages depending on combined assessment                                   |
|                           |      |                                                                                                          |
| <b>Swelling of joints</b> | 0    | Normal                                                                                                   |
|                           | 1-5  | Joint swelling depending on the severity of signs                                                        |
|                           | 5-10 | Severe swelling with lameness depending on the severity of signs                                         |
|                           |      |                                                                                                          |
| <b>Breathing</b>          | 1-5  | Labored and/or coughing depending on the severity of signs                                               |
|                           | 5-10 | Severe depending on the severity of signs                                                                |
| <b>Ocular discharge</b>   | 1-4  | Mild                                                                                                     |
|                           | 5-10 | Moderate                                                                                                 |
| <b>Digestive findings</b> | 0    | Normal                                                                                                   |
|                           | 1-3  | Mild diarrhea for less than 24 h                                                                         |
|                           | 4-6  | Moderate findings, e.g., diarrhea and vomiting for more than 24 h                                        |
|                           | 7-10 | Severe, bloody diarrhea and/or bloody urine                                                              |
|                           |      |                                                                                                          |
| <b>Body Temperature</b>   | 0    | 38-40.2°C                                                                                                |
|                           | 3-5  | 40.3-40.5°C                                                                                              |
|                           | 6-8  | 40.6-41°C                                                                                                |
|                           | 9-10 | > 41.0°C                                                                                                 |
|                           |      |                                                                                                          |

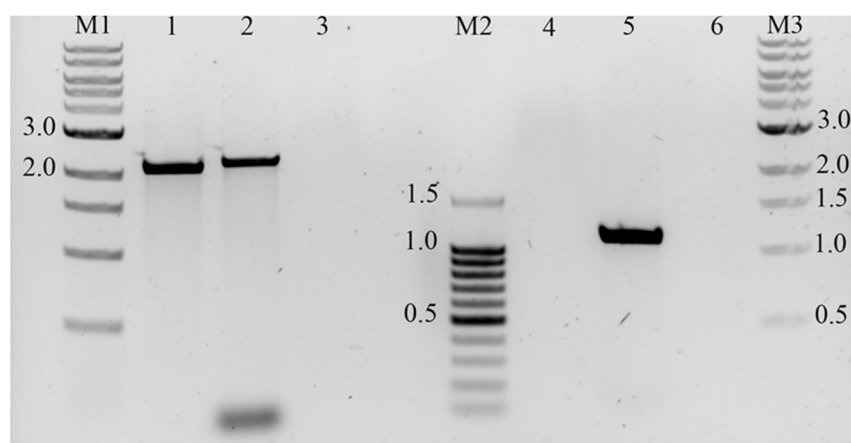

**Figure S1.** Analysis of the EP402R gene deletion in genomic viral DNA by PCR. Viral DNA was extracted from parental Congo-a virus and the recombinant  $\Delta$ CongoCD2v virus. Specific PCR fragments were amplified and analyzed by electrophoresis in 1.5% agarose gel. Lanes 1–3: PCR with primers flanking the recombination site; lanes 4–6: PCR of the complete EP402R gene. The following viral genomic DNAs were used as templates: recombinant  $\Delta$ CongoCD2v virus (lanes 1 and 4), parental Congo-a virus (lanes 2 and 5), no template (lanes 3 and 6). Lanes M1 and M3 contain a 1 kb DNA ladder, and lane M2 contains a 100 bp DNA ladder.

**Table S2.** Detection of EGFP gene in organs and lymph nodes of  $\Delta$ CongoCD2v and Congo-a immunized pigs following the challenge with ASFV Congo-v.

| Group              | # Animal | CT Value of Real-time PCR |       |       |                       |                           |
|--------------------|----------|---------------------------|-------|-------|-----------------------|---------------------------|
|                    |          | Spleen                    | Liver | Lung  | Mesenteric Lymph Node | Sub-mandibular Lymph Node |
| $\Delta$ CongoCD2v | 1/1      | 40,32                     | 42,21 | 33,01 | 43,17                 | 41,27                     |
|                    | 1/2      | Neg                       | Neg   | Neg   | 42,4                  | 43,54                     |
|                    | 1/3      | Neg                       | Neg   | Neg   | 44,89                 | Neg                       |
|                    | 1/4      | Neg                       | Neg   | 44,54 | Neg                   | Neg                       |
|                    | 1/5      | 41,32                     | Neg   | 39,87 | 42,67                 | 42,54                     |
|                    | 1/6      | 43,1                      | Neg   | 43,78 | 41,32                 | 42,76                     |
|                    | 1/7      | 43,98                     | Neg   | Neg   | Neg                   | 44,91                     |
| Congo-a            | 2/1      | Neg                       | Neg   | Neg   | Neg                   | Neg                       |
|                    | 2/2      | Neg                       | Neg   | Neg   | Neg                   | Neg                       |
|                    | 2/3      | Neg                       | Neg   | Neg   | Neg                   | Neg                       |
|                    | 2/4      | Neg                       | Neg   | Neg   | Neg                   | Neg                       |
|                    | 2/5      | Neg                       | Neg   | Neg   | Neg                   | Neg                       |

Neg – no CT value.
